# Supplementary material
Source: MDPI journal article supplement (https://www.mdpi.com/1424-2818/16/4/231)
Supplement: s1 [file s1]

## Mathematical Derivation of Existence and Stability of Equation 2-4 Partial Equilibrium Points

### Part I. Stability analysis for equations 2

(i) Stability of boundary equilibrium  $E_4(P_{1I}^*, I_I^*, 0)$

The Jacobian matrix for equation 2 is

$$J = \begin{pmatrix} c_1(1-P_1-I) - \beta I - c_1 P_1 - m_1 & -(c_1 + \beta)P_1 & 0 \\ \beta I & \beta P_1 - m_1 - d & 0 \\ -(c_1 + c_2)P_2 & -c_2 P_2 & c_2(1-P_1-P_2-I) - c_1 P_1 - c_2 P_2 - m_2 \end{pmatrix}$$

the Jacobi matrix of the equations at  $E_4(P_{1I}^*, I_I^*, 0)$  is

$$J(E_4) = \begin{pmatrix} c_1\sigma_1 - m_1 + \sigma_2 - \sigma_3 & -d_1 - m_1 - \sigma_3 & 0 \\ -\sigma_2 & 0 & 0 \\ 0 & 0 & c_2\sigma_1 - m_2 - \sigma_3 \end{pmatrix}$$

where  $\sigma_1 = \frac{c_1(m_1+d)-\beta(c_1-m_1)}{\beta(\beta+c_1)} - \frac{m_1+d}{\beta} + 1 = \frac{\beta-d}{\beta+c_1}$ ,  $\sigma_2 = \frac{c_1(m_1+d)-\beta(c_1-m_1)}{\beta+c_1}$ ,  $\sigma_3 = \frac{c_1(m_1+d)}{\beta}$ . It is easy to determine  $\sigma_2 < 0, \sigma_3 > 0$ , and by  $J(E_4)$ , it has two eigenvalues  $\lambda_1, \lambda_2$  satisfying the equation

$$\begin{vmatrix} \lambda - (c_1\sigma_1 - m_1 + \sigma_2 - \sigma_3) & d_1 + m_1 + \sigma_3 \\ \sigma_2 & \lambda \end{vmatrix}$$

i.e.,  $\lambda^2 - (c_1\sigma_1 - m_1 + \sigma_2 - \sigma_3)\lambda - (d_1 + m_1 + \sigma_3)\sigma_2 = 0$ , Combined with the existence condition for  $E_4$ , it is easy to see that  $\lambda_1 + \lambda_2 = c_1\sigma_1 - m_1 + \sigma_2 - \sigma_3 = -\frac{c_1\beta d + c_1 m_1 \beta + c_1^2 m_1 + c_1^2 d}{\beta(\beta+c_1)} < 0$ , so  $\lambda_1 < 0, \lambda_2 < 0$ , both eigenvalues have negative real parts; the third eigenvalue of  $J(E_4)$  is  $\lambda^* = c_2\sigma_1 - m_2 - \sigma_3 = \frac{(c_2-m_2)\beta^2 - (c_1+c_2)\beta d - (m_1+m_2)\beta c_1 - (m_1+d)c_1^2}{\beta(\beta+c_1)}$ . It is calculated that when

$$c_2 < \frac{[\beta m_2 + c_1(m_1 + d)](c_1 + \beta)}{\beta(\beta - d)} \triangleq c_{2I}$$

have  $\lambda^* < 0$ , the equilibrium  $E_4(P_{1I}^*, I_I^*, 0)$  is locally stable; opposite,  $E_4$  is unstable when  $c_2 > c_{2I}, \lambda^* > 0$ .

(ii) Stability of the internal equilibrium  $E_5(P_{1I}^*, I_I^*, P_{2I}^*)$

The eigenvalue of the Jacobi matrix of equations 2 at the positive equilibrium  $E_5(P_{1I}^*, I_I^*, P_{2I}^*)$  have three, two of them are  $\lambda_1, \lambda_2$ , satisfy the characteristic equations

$$\lambda^2 + a_1\lambda + a_2 = 0,$$

$$\text{where } a_1 = -[c_1(1 - P_{1I}^* - I_I^*) - \beta I_I^* - c_1 P_{1I}^* + \beta P_{1I}^* - 2m_1 - d] = \frac{m_1+d}{\beta} c_1,$$

$$a_2 = [c_1(1 - P_{1I}^* - I_I^*) - \beta I_I^* - c_1 P_{1I}^* - m_1](\beta P_{1I}^* - m_1 - d) + (c_1 + \beta)P_{1I}^*\beta I_I^* \\ = (c_1 + \beta)P_{1I}^*\beta I_I^*,$$

After calculating, there are  $\lambda_1 + \lambda_2 = -a_1 < 0$ ,  $\lambda_1 \cdot \lambda_2 = a_2 > 0$ , so  $\lambda_1 < 0, \lambda_2 < 0$ .

The third eigenvalue is  $\lambda_3 = c_2(1 - P_1^* - P_2^* - I^*) - c_1 P_1^* - c_2 P_2^* - m_2$ , to make  $\lambda_3 < 0$ , only  $c_2 > c_{2I}$ , since the equilibrium  $E_5(P_{1I}^*, I_I^*, P_{2I}^*)$  is locally stable, which, combined with its existence, is asymptotically stable as long as  $E_5$  exists.

In addition,  $E_5$  as the only internal equilibrium point, local asymptotic stability is also global asymptotic stability.

## Part II. Existence and stability of equilibrium of equations 3.

(i) Existence of the endemic disease equilibrium

The endemic disease equilibrium must be the solution of following equation

$$\begin{cases} (c_1 P_1 + \delta c_1 I)(1 - P_1 - I) - \beta P_1 I - m_1 P_1 = 0 \\ \beta P_1 - m_1 - d = 0 \\ c_2 P_2(1 - P_1 - P_2 - I) - (c_1 P_1 + \delta c_1 I)P_2 - m_2 P_2 = 0 \end{cases} \quad (S1)$$

from the second equation of (S1), have  $P_{1I}^* = \frac{m_1+d}{\beta}$ , substituting  $P_{1I}^*$  into the first equation of (S1), have

$$A(I)^2 + BI + C = 0 \quad (S2)$$

where  $A = \delta c_1 > 0$ ,  $B = \delta c_1(P_{1I}^* - 1) + (c_1 + \beta)P_{1I}^*$ ,  $C = c_1(P_{1I}^*)^2 - (c_1 - m_1)P_{1I}^*$ .

Thus equation (S3) has at most two positive roots, for ease of discussion, denoted as

$$f(I) = A(I)^2 + BI + C \quad (S3)$$

Clearly,  $f(0) = C = \frac{m_1+d}{\beta} \cdot \frac{c_1(m_1+d)-(c_1-m_1)\beta}{\beta}$ ,  $f(1) > 0$ , and axis of symmetry  $\hat{I}^* = -\frac{B}{2A}$ .

It is not difficult to derive the existence of positive roots of equation (S3) as follows,

(1) When  $f(0) > 0$  and  $\hat{I}^* > 0$ , i.e.  $\beta < \frac{c_1(m_1+d)}{c_1-m_1}$ ,  $\delta > \frac{(c_1+\beta)(m_1+d)}{c_1(\beta-m_1-d)}$ , the number of positive roots of equations (S2) depends on  $\Delta$ ,  $\Delta = B^2 - 4AC$ .

When  $\Delta < 0$ , equations (S2) have no positive roots.

When  $\Delta = 0$ , equations (S2) have one positive heavy root,

When  $\Delta > 0$ , equations (S2) have two positive roots.

(2) When  $f(0) < 0$ , i.e.  $\beta > \frac{c_1(m_1+d)}{c_1-m_1}$ , (S2) have only one positive root  $I_+^*$ ;

(3) When  $f(0) = 0$  and  $\hat{I}^* > 0$ , there is  $\beta = \frac{c_1(m_1+d)}{c_1-m_1}$ ,  $\delta > \frac{(c_1+\beta)(m_1+d)}{c_1(\beta-m_1-d)}$ , equations (S2) have only one positive root;

However, this paper assumes  $0 < \delta < 1$ , but  $\delta > \frac{(c_1+\beta)(m_1+d)}{c_1(\beta-m_1-d)} \geq 1$  when  $\beta \leq \frac{c_1(m_1+d)}{c_1-m_1}$ . Thus, there is only one case, equation (S2) have only one positive root when  $\beta > \frac{c_1(m_1+d)}{c_1-m_1}$ , denoted as  $I_I^*$ , which substituted into the third equation of equation (S1), have  $P_{2I}^* = 1 - \frac{m_2}{c_2} - (1 + \frac{c_1}{c_2})P_{1I}^* - (1 + \delta \frac{c_1}{c_2})I_I^*$ . To make it positive, we have

$$c_2 > \frac{c_1(m_1+d) + \beta m_2 + \delta c_1 \beta I_I^*}{\beta - m_1 - d - \beta I_I^*} \triangleq c_{2I} \quad (S4)$$

Summarizing the above, the existence of the endemic disease equilibrium for the equations 3 as follows:

(1) Equilibrium  $E_4(P_1^*, I^*, 0)$  exist when  $\beta > \frac{c_1(m_1+d)}{c_1-m_1}$ ;

(2) Equilibrium  $E_5(P_1^*, I^*, P_2^*)$  exist when  $\beta > \frac{c_1(m_1+d)}{c_1-m_1}$ ,  $c_2 > c_{2I}$ ,

$$\text{where } P_{1I}^* = \frac{m_1+d}{\beta}, I_I^* = \frac{-B+\sqrt{\Delta}}{2A}, P_{2I}^* = 1 - \frac{m_2}{c_2} - (1 + \frac{c_1}{c_2})P_{1I}^* - (1 + \delta \frac{c_1}{c_2})I_I^*,$$

$$\Delta = B^2 - 4AC, A, B, C \text{ see above.}$$

(ii) Stabilization of endemic disease equilibrium

For the equilibrium  $E_5(P_1^*, I_I^*, P_2^*)$ , which the Jacobi matrix of the equations 3 as

$$J = \begin{pmatrix} c_1(1-P_1^*-I^*)-c_1P_1^*-(\delta c_1+\beta)I^*-m_1 & \delta c_1(1-P_1^*-I^*)-\delta c_1I^*-(c_1+\beta)P_1^* & 0 \\ \beta I^* & \beta P_1^*-m_1-d & 0 \\ -(c_1+c_2)P_2^* & -(\delta c_1+c_2)P_2^* & c_2(1-P_1^*-P_2^*-I^*)-c_1P_1^*-c_2P_2^*-\delta c_1I^*-m_2 \end{pmatrix}$$

the characteristic equation is

$$(\lambda - \lambda^*)f(\lambda) = 0 \quad (\text{S5})$$

$$\text{where } \lambda^* = c_2(1 - P_{1I}^* - P_{2I}^* - I_I^*) - c_1P_{1I}^* - c_2P_{2I}^* - \delta c_1I_I^* - m_2,$$

$$f(\lambda) = \lambda^2 + a_1\lambda + a_2, \quad a_1 = -c_1(1 - P_{1I}^* - I_I^*) + c_1P_{1I}^* + (\beta + \delta c_1)I_I^* + m_1,$$

$$a_2 = -\beta I_I^*[\delta c_1(1 - P_{1I}^* - 2I_I^*) - (c_1 + \beta)P_{1I}^*].$$

Clearly, one of the characteristic roots of (S5) is  $\lambda^*$ , and the other two characteristic roots  $\lambda_1, \lambda_2$  satisfy

$$\lambda_1 + \lambda_2 = -a_1, \lambda_1\lambda_2 = a_2, \quad (\text{S6})$$

which constructs  $P_{2I}^*\lambda^* = c_2P_{2I}^*(1 - P_{1I}^* - P_{2I}^* - I_I^*) - (c_1P_{1I}^* + \delta c_1I_I^*)P_{2I}^* - m_2P_{2I}^* - c_2(P_{2I}^*)^2 = -c_2(P_{2I}^*)^2 < 0$ , so  $\lambda^* < 0$ ; from  $C = c_1(P_{1I}^*)^2 - c_1P_{1I}^* + m_1P_{1I}^*$ , we have  $a_1 = \frac{C}{P_{1I}^*} + c_1P_{1I}^* + (c_1 + \beta + \delta c_1)I_I^*$ . Combined with the condition for the existence of the equilibrium point  $E_5(C < 0)$ , for  $a_1 > 0$ , we need  $-\delta(1 - P_{1I}^* - I_I^*) - \frac{P_{1I}^*}{I_I^*} = \frac{c_1(1-P_{1I}^*-I_I^*)-c_1P_{1I}^*-\beta I_I^*-m_1}{c_1I_I^*} < \delta$ , which clearly holds.

From  $B = \delta c_1(P_{1I}^* - 1) + (c_1 + \beta)P_{1I}^*$ , so  $a_2 = -\beta I_I^*(-B - 2\delta c_1I_I^*) = \beta I_I^*\sqrt{\Delta} \geq 0$  ( $I_I^*$  takes a positive value to ensure its nonnegativity, and the equality sign holds only for  $\Delta = 0$ ). Therefore, all eigenvalues have negative real parts, hence equilibrium  $E_5(P_1^*, I_I^*, P_2^*)$  is a locally stable.

For the stability of equilibrium  $E_4(P_{1I}^*, I_I^*, 0)$ , equivalent to take  $P_{2I}^* = 0$  in

the above process. Correspondingly, only the first eigenvalue changes to:

$$\lambda_0^* = c_2(1 - P_{1I}^* - I_I^*) - c_1 P_{1I}^* - \delta c_1 I_I^* - m_2 \quad (S7)$$

We have  $\lambda_0^* < 0$  when  $c_2 < c_{2I}$ , and the remaining two eigenvalues  $\lambda_1, \lambda_2$  remain unchanged (same as (S6), (S7)), both are less than zero. Hence,  $E_4(P_{1I}^*, I_I^*, 0)$ .

In summary,

- (1) When  $c_2 < c_{2I}$ , the equilibrium  $E_4(P_{1I}^*, I_I^*, 0)$  is locally stable;
- (2) The equilibrium  $E_5(P_{1I}^*, I_I^*, P_{2I}^*)$  is locally stable as long as it exists.

### Part III. Stability of equilibrium points of the Equations 4.

The internal equilibrium  $E_5\left(\frac{B_1}{B_0}, \frac{B_2}{B_0}, \frac{B_3}{B_0}\right) = (P_{1I}^*, I_I^*, P_{2I}^*)$

where,  $B_0 = (c_1 + \beta)(c_1 c + c_2 \beta)$ ,  $B_1 = (c_1 + \beta)(c_2 d + c_2 m_1 - c m_2)$ ,

$B_2 = c_1 c(c_1 - m_1 + m_2) + (c_1 c_2 - c_2 m_1)\beta - c_1 c_2(m_1 + d)$ ,  $B_3 = (c_2 - m_2)\beta^2 - \mu_1 \beta + \mu_2$ ,  $\mu_1 = c_1 d + c_2 d + c_1 m_1 + c_1 m_2 - c m_2 - c c_1$ ,  $\mu_2 = c c_1 m_1 - c_1^2 m_1 - c_1^2 d$ .

Only the stability analysis of  $E_4, E_5$  are given here, the rest of the other equilibrium will not be repeated.

The Jacobian matrix for the Equations 4 is

$$J = \begin{pmatrix} c_1(1 - P_1 - I) - \beta I - c_1 P_1 - m_1 & -c_1 P_1 - \beta P_1 & 0 \\ \beta I - cI & c(1 - P_1 - P_2 - I) - cI + \beta P_1 - m_1 - d & -cI \\ -(c_1 + c_2)P_2 & -c_2 P_2 & c_2(1 - P_1 - P_2 - I) - c_1 P_1 - c_2 P_2 - m_2 \end{pmatrix}$$

as a result, the Jacobi matrix at equilibrium point  $E_4 = (P_{1I}^*, I_I^*, 0) = (\frac{A_1}{A_0}, \frac{A_2}{A_0}, 0)$

as

$$J(E_4) = \begin{pmatrix} c_1 \sigma_1 - m_1 + \frac{\sigma_4}{\sigma_2} \beta - \frac{\sigma_3}{\sigma_2} c_1 & -(\beta + c_1) \frac{\sigma_3}{\sigma_2} & 0 \\ (c - \beta) \frac{\sigma_4}{\sigma_2} & c_1 \sigma_1 - m_1 - d + \frac{\sigma_4}{\sigma_2} c + \frac{\sigma_3}{\sigma_2} \beta & \frac{\sigma_4}{\sigma_2} c \\ 0 & 0 & c_2 \sigma_1 - m_2 - \frac{\sigma_3}{\sigma_2} c_1 \end{pmatrix}$$

where:  $\sigma_1 = \frac{\sigma_4}{\sigma_2} - \frac{\sigma_3}{\sigma_2} + 1 = \frac{\beta(\beta-d)}{\sigma_2}$ ,  $\sigma_2 = \beta c_1 - \beta c + \beta^2 > 0$ ,

$\sigma_3 = \beta d - \beta c + c_1 d + c_1 m_1 + \beta m_1 - c m_1 > 0$ ,  $\sigma_4 = c_1 d + c_1 m_1 - c m_1 + \beta m_1 - \beta c_1 < 0$ . By  $J(E_4)$ , there is an eigenvalue

$$\lambda^* = c_2 \sigma_1 - m_2 - \frac{\sigma_3}{\sigma_2} c_1 = \frac{(c_2 - m_2)\beta^2 - \mu_1 \beta + \mu_2}{\beta(\beta - c + c_1)},$$

where  $\mu_1 = c_1 d + c_2 d + c_1 m_1 + c_1 m_2 - c m_2 - c c_1$ ,  $\mu_2 = c c_1 m_1 - c_1^2 m_1 - c_1^2 d$ ,  
if

$$c_2 > \frac{c_1^2(m_1 + d) + \beta[c_1(m_1 + d) + \beta m_2 - c c_1 - c m_2 + c_1 m_2] - c c_1 m_1}{\beta(\beta - d)} \triangleq c_{2I}$$

then  $\lambda^* > 0$ . So that the equilibrium  $E_4(P_{1I}^*, I_I^*, 0)$  is unstable.

The local stability of the equilibrium  $E_5 = (\frac{B_1}{B_0}, \frac{B_2}{B_0}, \frac{B_3}{B_0}) = (P_{1I}^*, I_I^*, P_{2I}^*)$  is discussed below, and the Jacobi matrix of the equations 4 at  $E_5(P_{1I}^*, I_I^*, P_{2I}^*)$  is

$$J(P_{1I}^*, I_I^*, P_{2I}^*) = \begin{pmatrix} A_{11} & A_{12} & 0 \\ A_{21} & A_{22} & A_{23} \\ A_{31} & A_{32} & A_{33} \end{pmatrix},$$

where  $A_{11} = c_1(1 - P_{1I}^* - I_I^*) - c_1 P_{1I}^* - \beta I_I^* - m_1$ ,  $A_{12} = -c_1 P_{1I}^* - \beta P_{1I}^*$ ,  $A_{21} = -c I_I^* + \beta I_I^*$ ,  $A_{22} = c(1 - P_{1I}^* - P_{2I}^* - I_I^*) - c I_I^* + \beta P_{1I}^* - m_1 - d$ ,  $A_{23} = -c I_I^*$ ,  $A_{31} = -c_1 P_{2I}^* - c_2 P_{2I}^*$ ,  $A_{32} = -c_2 P_{2I}^*$ ,  $A_{33} = c_2(1 - P_{1I}^* - P_{2I}^* - I_I^*) - c_1 P_{1I}^* - c_2 P_{2I}^* - m_2$ . Its characteristic equation is:

$$\lambda^3 + a_1 \lambda^2 + a_2 \lambda + a_3 = 0$$

Where  $a_1 = -(A_{11} + A_{22} + A_{33})$ ,  $a_2 = A_{11}A_{22} + A_{11}A_{33} + A_{22}A_{33} - A_{23}A_{32} - A_{12}A_{21}$ ,  $a_3 = -A_{11}A_{22}A_{33} - A_{12}A_{21}A_{33} - A_{12}A_{23}A_{31} + A_{11}A_{23}A_{32}$ ,

According to the Routh-Hurwitz criterion,  $E_5(P_{1I}^*, I_I^*, P_{2I}^*)$  is locally asymptotically stabilized when  $a_1 > 0$ ,  $a_3 > 0$ ,  $a_1 a_2 - a_3 > 0$ .
